# Supplementary material for: MicroRNA-124-3p-enriched small extracellular vesicles as a therapeutic approach for Parkinson’s disease
Source: PubMed Central journal article supplement — Mol Ther. 2022 Jun 9;30(10):3176–92. doi: 10.1016/j.ymthe.2022.06.003 (PMC9552816; doi:10.1016/j.ymthe.2022.06.003), 2022-06-09
Supplement: mmc1.pdf [file mmc1.pdf]

YMTHE, Volume 30

## **Supplemental Information**

### **MicroRNA-124-3p-enriched**

**small extracellular vesicles as a therapeutic**

**approach for Parkinson's disease**

**Marta Esteves, Ricardo Abreu, Hugo Fernandes, Catarina Serra-Almeida, Patrícia A.T. Martins, Marta Barão, Ana Clara Cristóvão, Cláudia Saraiva, Raquel Ferreira, Lino Ferreira, and Liliana Bernardino**

## Supplementary material

### Figures

**A**

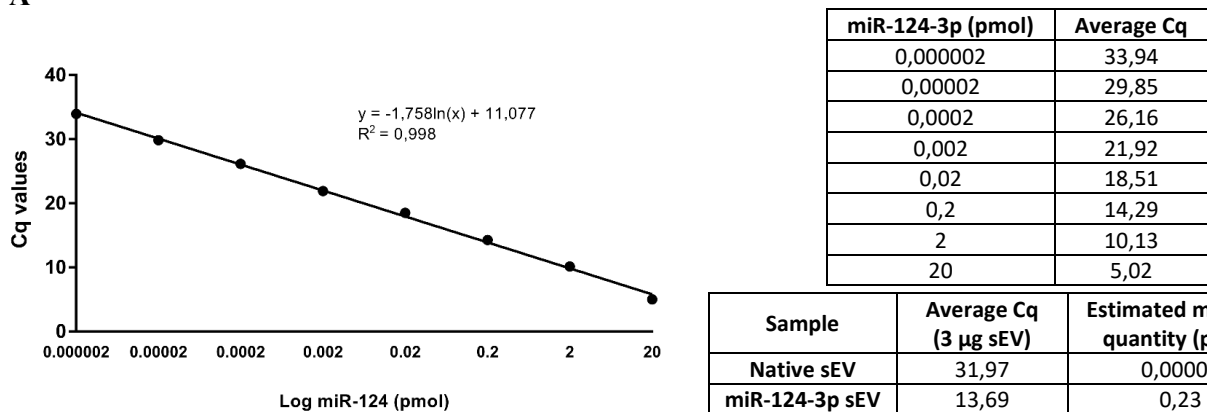

**B**

| Sample         | Estimated miR-124 copies number             |                                              |                                               |
|----------------|---------------------------------------------|----------------------------------------------|-----------------------------------------------|
|                | 3 µg sEV (6.90 x 10 <sup>9</sup> particles) | 6 µg sEV (1.38 x 10 <sup>10</sup> particles) | 10 µg sEV (2.30 x 10 <sup>10</sup> particles) |
| Native sEV     | 6.022 x 10 <sup>6</sup>                     | 1.2 x 10 <sup>7</sup>                        | 2 x 10 <sup>7</sup>                           |
| miR-124-3p sEV | 1.39 x 10 <sup>11</sup>                     | 2.78 x 10 <sup>11</sup>                      | 4.6 x 10 <sup>11</sup>                        |

**Figure S1. Copies number extrapolation of miR-124 in sEVs.** (A) Calibration curve of miR-124-3p. Correlation analysis between Cq values and log amount of 10-fold serially diluted miR-124-3p (pmol). Each point represents the mean value of duplicate measurements. (B) miR-124 copy number extrapolation. Copies number of miR-124 endogenously present in native sEVs or loaded into miR-124-3p sEVs were extrapolated using (A) calibration curve of synthetic miR-124-3p. The resultant (A) value of miR-124 (pmol) was converted to miRNA molecules by multiplication through Avogadro's constant ( $\approx 6.022 \times 10^{23} \text{ mol}^{-1}$ ). Abbreviations: pmol: picomol; miR-124-3p sEV: miR-124-3p-loaded small extracellular vesicles; Cq: quantification cycle.

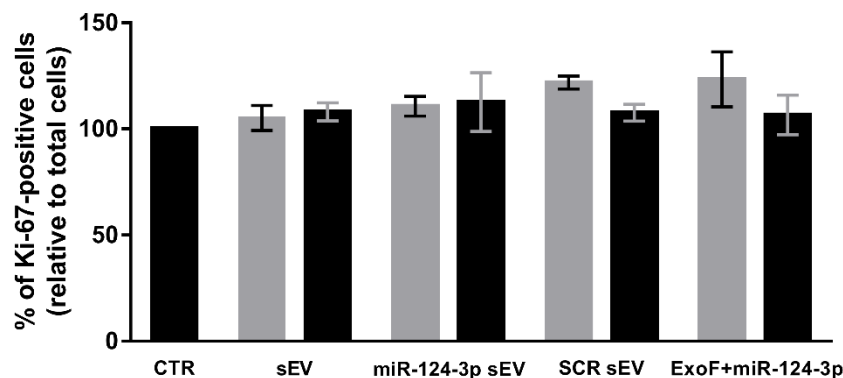

**Figure S2. miR-124-3p sEVs do not affect total cell proliferation in SVZ cell cultures.** Cell proliferation was evaluated by colocalization against Ki-67, 2 days after the SVZ NSCs treatment with  $1.5 \times 10^9$  (gray bars) or  $3 \times 10^9$  (black bars) particles/mL of sEVs, miR-124-3p sEVs, SCR sEVs or ExoF + miR-124-3p. Data are expressed as percentage of control (mean  $\pm$  SEM; n = 3 - 5). Abbreviations: CTR: control; sEV: native small extracellular vesicles; miR-124-3p sEV: miR-124-3p-loaded small extracellular vesicles; SCR: scramble miR; ExoF: Exo-Fect<sup>TM</sup>.

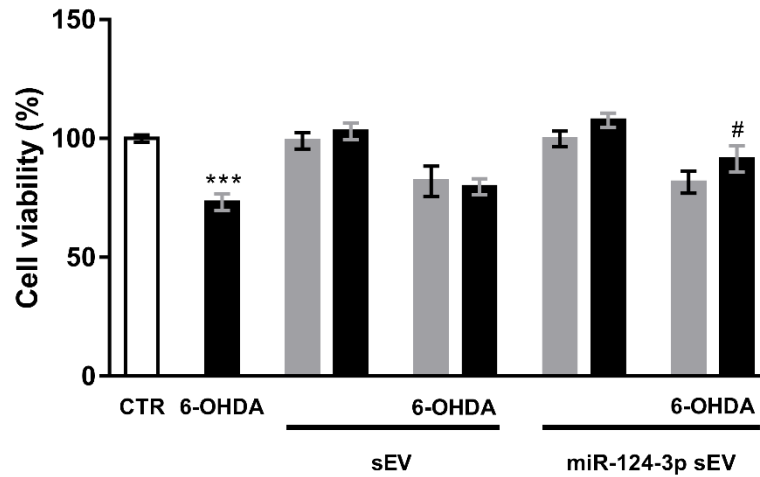

**Figure S3. miR-124-3p sEVs promote neuroprotection against 6-OHDA-induced toxicity in N27 rat dopaminergic cells.** MiR-124-3p sEVs counteract dopaminergic cell death induced by 6-OHDA. Cell viability was assessed in N27 rat dopaminergic neural cell line exposed to 50  $\mu$ M 6-OHDA and  $1.5 \times 10^9$  (gray bars) or  $3 \times 10^9$  particles/mL (black bars) of sEVs or miR-124-3p SEVs for 24h, by the CCK-8 kit assay. Data are expressed as a percentage of control (mean  $\pm$  SEM;  $n=3$  in all experimental conditions except for sEVs + 6-OHDA at  $3 \times 10^9$  particles/mL:  $n=2$ ), from three independent experiments performed in triplicate. \*\*\* $p < 0.0001$  vs. control and # $p < 0.05$  vs. 6-OHDA-treated cells, using one-way ANOVA followed by Dunnett's multiple comparison test. Abbreviations: CTR: control; 6-OHDA: 6-hydroxydopamine; sEV: native small extracellular vesicles; miR-124-3p sEV: miR-124-3p-loaded small extracellular vesicles.
